# Supplementary material for: Diagnostic Interpretation Guidance for Pediatric Enteric Pathogens: A Modified Delphi Consensus Process
Source: Can J Infect Dis Med Microbiol. 2018 Sep 27;2018:2589826. doi: 10.1155/2018/2589826 (PMC6180965; doi:10.1155/2018/2589826)
Supplement: Supplementary Materials — Supplemental Table 1: demographic information for participants of the initial survey. Supplemental Table 2: expert panel members. [file 2589826.f1.pdf]

**Supplemental Table 1:** Demographic Information for Participants of Initial Survey

| <b>Characteristic</b>               | <b>Numerator</b> | <b>Denominator</b> | <b>Proportion (%)</b> |
|-------------------------------------|------------------|--------------------|-----------------------|
| <b>Age</b>                          |                  |                    |                       |
| 30 to <40                           | 4                | 37                 | 10.81                 |
| 40 to <50                           | 19               | 37                 | 51.35                 |
| 50 to <60                           | 8                | 37                 | 21.62                 |
| 60 to <70                           | 6                | 37                 | 16.22                 |
| <b>Country</b>                      |                  |                    |                       |
| Canada                              | 28               | 37                 | 75.68                 |
| United States                       | 9                | 37                 | 24.32                 |
| <b>Province</b>                     |                  |                    |                       |
| Alberta                             | 14               | 27                 | 51.85                 |
| British Columbia                    | 1                | 27                 | 3.70                  |
| Northwest Territories               | 1                | 27                 | 3.70                  |
| Nova Scotia                         | 2                | 27                 | 7.41                  |
| Ontario                             | 8                | 27                 | 29.63                 |
| Quebec                              | 1                | 27                 | 3.70                  |
| <b>Area or Expertise/Practice</b>   |                  |                    |                       |
| Medical microbiology                | 14               | 37                 | **                    |
| Emergency medicine –<br>paediatrics | 7                | 37                 | **                    |
| Infectious disease –<br>paediatrics | 7                | 37                 | **                    |
| Community/public<br>health          | 6                | 37                 | **                    |
| Laboratory medicine                 | 6                | 37                 | **                    |
| Epidemiology                        | 5                | 37                 | **                    |
| Infectious disease- adult           | 4                | 37                 | **                    |
| Gastroenterology –<br>paediatrics   | 4                | 37                 | **                    |
| Family medicine                     | 2                | 37                 | **                    |
| Health economics                    | 1                | 37                 | **                    |
| Emergency medicine –<br>general     | 1                | 37                 | **                    |
| Other                               | 3                | 37                 | **                    |

**Supplemental Table 2: Expert Panel Members\***

| <b>Name</b>       | <b>City, State/ Province, Country</b> | <b>Academic Affiliation (i.e. university)</b> | <b>Agency Affiliation</b>      |
|-------------------|---------------------------------------|-----------------------------------------------|--------------------------------|
| Astrid Petrich    | Toronto, ON, Canada                   | University of Toronto                         | The Hospital for Sick Children |
| Bonita Lee        | Edmonton, AB, Canada                  | University of Alberta                         | Alberta Health Services        |
| Brendon Parsons   | Edmonton, AB, Canada                  | University of Alberta                         | ProvLab Alberta                |
| Carey-Ann Burnham | St. Louis, MO, United States          | Washington University                         | Barnes-Jewish Hospital         |
| David Goldfarb    | Hamilton, ON, Canada                  | University of British Columbia                | BC Children's Hospital         |
| Frank Pollari     | Guelph, ON, Canada                    |                                               | Public Health Agency of Canada |
| Graham Tipples    | Edmonton, AB, Canada                  | University of Alberta                         | ProvLab Alberta                |
| Judy MacDonald    | Calgary, AB, Canada                   | University of Calgary                         | Alberta Health Services        |
| Xiao-Li Pang      | Edmonton, AB, Canada                  | University of Alberta                         | ProvLab Alberta                |
| Linda Chui        | Edmonton, AB, Canada                  | University of Alberta                         | ProvLab Alberta                |
| Phil Tarr         | St. Louis, MO, United States          | Washington University                         | St. Louis Children's Hospital  |
| Ran Zhuo          | Edmonton, AB, Canada                  | University of Alberta                         | ProvLab Alberta                |
| Stephen Freedman  | Calgary, AB, Canada                   | University of Calgary                         | Alberta Health Services        |
| Vanessa Allen     | Toronto, ON, Canada                   | University of Toronto                         | Public Health Ontario          |

\*All participants consented to the publication of their identities.
